# Supplementary material for: Nutrition-sensitive agriculture programs increase dietary diversity in children under 5 years: A review and meta-analysis
Source: PubMed Central journal article supplement (PMC8849260; doi:10.7189/jogh.12.08001), 2022-02-19

## Supplementary Materials

**Supplemental Figure 1.** Funnel plot assessing symmetry of treatment effect estimates

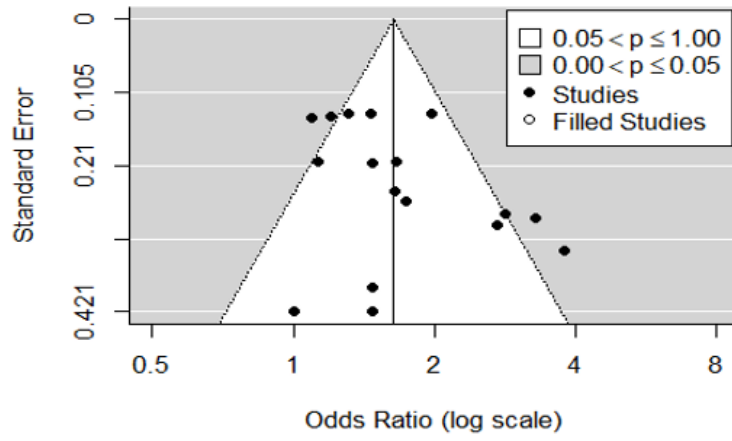

Supplement: jogh-12-08001-s001.pdf [file jogh-12-08001-s001.pdf]
